# Supplementary material
Source: Springer Nature journal article supplement (https://www.springermedizin.de/resource/supplementary/12913_2011_1995_MOESM1_ESM.doc/9530596)
Supplement: MOESM1 [file 9530596]

FIGURE 1: Proportion of Outpatient Use in Medicare and VA by Visit Type - Overall Sample, FY2001-2004
